# Supplementary material
Source: PubMed Central journal article supplement (PMC6349480)
Supplement: NIHMS1515763-supplement-Supplemental_Material.pdf [file NIHMS1515763-supplement-Supplemental_Material.pdf]

## **SUPPLEMENTAL MATERIAL**



|                        |      |      |      |      |      |      |      |        |
|------------------------|------|------|------|------|------|------|------|--------|
| Commercial/private     | 39.3 | 45.6 | 45.0 | 41.2 | 38.1 | 33.3 | 32.6 |        |
| Medicare               | 43.7 | 39.7 | 39.6 | 40.2 | 40.6 | 40.4 | 36.7 |        |
| Medicaid               | 5.6  | 3.3  | 2.6  | 2.7  | 2.4  | 3.2  | 3.3  |        |
| Self-pay               | 6.3  | 5.4  | 5.0  | 4.7  | 4.4  | 4.4  | 4.8  |        |
| Others                 | 0.4  | 0.2  | 0.1  | 0.2  | 0.3  | 0.3  | 0.3  |        |
| No information         | 4.7  | 5.8  | 7.7  | 11.0 | 14.2 | 18.4 | 22.3 |        |
| Use of medications (%) |      |      |      |      |      |      |      |        |
| Lipid-lowering         | 55.7 | 63.2 | 62.9 | 60.8 | 56.3 | 52.1 | 45.5 | <0.001 |
| Antihypertensive       | 76.6 | 78.7 | 77.8 | 76.3 | 75.1 | 73.6 | 72.7 | <0.001 |
| Glucose-lowering       | 71.9 | 75.5 | 72.8 | 69.6 | 64.6 | 62.9 | 58.2 | <0.001 |

Data are mean (SE) or n (%) unless otherwise indicated. All continuous variables are adjusted for age and race, except for age (adjusted for race only).

**Supplemental Table II.** Hazard ratios of subtypes of hemorrhagic stroke by different levels of high-density lipoprotein cholesterol at baseline and during follow-up among patients with type 2 diabetes

|                                 | High-density lipoprotein cholesterol (mg/dL) |                  |                  |                  |                  |                  |      | P for trend |
|---------------------------------|----------------------------------------------|------------------|------------------|------------------|------------------|------------------|------|-------------|
|                                 | <30                                          | 30-39.9          | 40-49.9          | 50-59.9          | 60-69.9          | 70-79.9          | ≥80* |             |
| <b>Subarachnoid Hemorrhage</b>  |                                              |                  |                  |                  |                  |                  |      |             |
| Baseline value                  |                                              |                  |                  |                  |                  |                  |      |             |
| Cases                           | 14                                           | 25               | 23               | 10               | 7                | 5                | -    |             |
| Person-years                    | 19,589                                       | 59,267           | 55,863           | 27,921           | 11,279           | 6,061            | -    |             |
| Model 1                         | 1.00                                         | 0.57 (0.30-1.11) | 0.52 (0.26-1.02) | 0.42 (0.18-0.98) | 0.30 (0.09-1.08) | 0.95 (0.33-2.72) | -    | 0.183       |
| Model 2                         | 1.00                                         | 0.62 (0.32-1.22) | 0.57 (0.28-1.17) | 0.46 (0.19-1.11) | 0.32 (0.09-1.20) | 0.77 (0.23-2.56) | -    | 0.435       |
| Model 3                         | 1.00                                         | 0.63 (0.32-1.23) | 0.57 (0.28-1.18) | 0.47 (0.19-1.13) | 0.32 (0.09-1.20) | 0.77 (0.23-2.56) | -    | 0.455       |
| Updated mean value              |                                              |                  |                  |                  |                  |                  |      |             |
| Cases                           | 8                                            | 18               | 16               | 8                | 3                | 1                | -    |             |
| Person-years                    | 10,224                                       | 47,482           | 50,458           | 25,958           | 9,875            | 4,655            | -    |             |
| Model 1                         | 1.00                                         | 0.48 (0.21-1.11) | 0.38 (0.16-0.92) | 0.35 (0.13-0.99) | 0.79 (0.27-2.32) | 0.24 (0.03-2.02) | -    | 0.169       |
| Model 2                         | 1.00                                         | 0.55 (0.23-1.31) | 0.46 (0.18-1.18) | 0.43 (0.14-1.28) | 0.94 (0.30-2.96) | 0.27 (0.03-2.35) | -    | 0.333       |
| Model 3                         | 1.00                                         | 0.56 (0.24-1.32) | 0.47 (0.18-1.19) | 0.43 (0.14-1.28) | 0.93 (0.29-2.96) | 0.24 (0.03-2.39) | -    | 0.343       |
| <b>Intracerebral hemorrhage</b> |                                              |                  |                  |                  |                  |                  |      |             |
| Baseline value                  |                                              |                  |                  |                  |                  |                  |      |             |
| Cases                           | 27                                           | 57               | 40               | 22               | 11               | 8                | -    |             |
| Person-years                    | 19,598                                       | 59,322           | 55,897           | 27,939           | 11,281           | 6,059            | -    |             |
| Model 1                         | 1.00                                         | 0.71 (0.45-1.12) | 0.51 (0.31-0.84) | 0.54 (0.30-0.98) | 0.47 (0.21-1.06) | 0.86 (0.38-1.95) | -    | 0.101       |
| Model 2                         | 1.00                                         | 0.76 (0.48-1.22) | 0.54 (0.32-0.91) | 0.55 (0.30-1.01) | 0.45 (0.20-1.05) | 0.75 (0.32-1.75) | -    | 0.183       |
| Model 3                         | 1.00                                         | 0.80 (0.50-1.28) | 0.58 (0.34-0.98) | 0.59 (0.32-1.09) | 0.48 (0.21-1.11) | 0.77 (0.33-1.80) | -    | 0.289       |
| Updated mean value              |                                              |                  |                  |                  |                  |                  |      |             |
| Cases                           | 14                                           | 45               | 34               | 16               | 8                | 4                | -    |             |
| Person-years                    | 10,236                                       | 47,526           | 50,486           | 25,977           | 9,875            | 4,657            | -    |             |
| Model 1                         | 1.00                                         | 0.69 (0.38-1.26) | 0.47 (0.25-0.90) | 0.41 (0.19-0.87) | 0.72 (0.31-1.64) | 0.54 (0.17-1.71) | -    | 0.139       |
| Model 2                         | 1.00                                         | 0.73 (0.39-1.35) | 0.48 (0.24-0.94) | 0.39 (0.18-0.87) | 0.63 (0.26-1.52) | 0.43 (0.13-1.42) | -    | 0.152       |
| Model 3                         | 1.00                                         | 0.76 (0.41-1.40) | 0.51 (0.26-0.99) | 0.42 (0.19-0.93) | 0.67 (0.28-1.62) | 0.44 (0.13-1.46) | -    | 0.204       |

Data are hazard ratios (95% confidence intervals) unless otherwise indicated. Model 1 adjusted for age, race and sex. Model 2 adjusted for age, race, sex, body mass index, systolic blood pressure, HbA1c, low-density lipoprotein cholesterol, triglycerides, estimated GFR, and smoking. Models 3 adjusted for age, race, sex, body mass index, systolic blood pressure, HbA1c, low-density lipoprotein cholesterol, triglycerides, estimated GFR, smoking, use of antihypertensive drugs, use of diabetes medications, and use of lipid-lowering agents.

\* Since no hemorrhagic event occurred in this subgroup, we combined this group with HDL cholesterol 70-79.9 mg/dL group.
